# Supplementary material for: How do individual behaviors based on visual and auditory cues facilitate spatiotemporal coordination in collective movement of patas monkeys (Erythrocebus patas)?
Source: Research Square preprint supplement (doi:10.21203/rs.3.rs-7212680/v1), 2025-09-02
Supplement: Supplementary file 1 [file 3d6525dff88f20b16a642e1e.xlsx]

## Sheet: Sheet1
Label	Meaning
【Model1】
date	Dateitme
Focal	Focal ID
monitor	The occurrence of visual monitoring.
calling	The occurrence of contact calls.
Area	Visibility of the location (we included only "clear" for all analysis).
min_dist.ff	Nearest IID between the focal female and other females.
male_dist	IID between the focal female and the male.
mean_dist.mf	Mean IID between other collared individuals.
num_u10to20_A	The number of adults within 20 m from the focal animal.
num_u10to20_J	The number of juveniles within 20 m from the focal animal.
faster_than_closest	Whether the focal ainimal was faster than the nearest collared individual.
sa_veloabs_10	Absolute value of the difference between the travel velocity of the focal animal and mean travel velocity of others.
focal_velo_10	Travel velocity of the focal animal.
session_ID	Session ID
【Model2】
num_u10to20_J_sa_next	The change in the number of juveniles within 20 m of the focal female at the future time compared to the current time.
dec_u10to20_J_sa_prev	Whether the number of juveniles within 20 m of the focal female at the current time was smaller than the previous time or not.
sa_veloabs_cn	The change in the velocity difference between the male and the females at the future time period compared to the current time period.
large_sa_veloabs_pc	Whether the difference in the velocity between the male and the females at the current time period was larger than the previous time period.
close_sa_veloabs_pc	Whether the difference in the velocity between the focal females and others at the current time period was smaller than the previous time period.
sa_mean_velo10_pn	The change in the mean velocity of others at the future time period compared to the previous time period.
focal_velo_10	Travel velocity of the focal animal.
